# Supplementary material for: Rapid nuclear deadenylation of mammalian messenger RNA
Source: PubMed Central journal article supplement — iScience. 2022 Dec 28;26(1):105878. doi: 10.1016/j.isci.2022.105878 (PMC9860345; doi:10.1016/j.isci.2022.105878), 2022-12-28
Supplement: mmc1.pdf [file mmc1.pdf]

iScience, Volume 26

**Supplemental information**

**Rapid nuclear deadenylation  
of mammalian messenger RNA**

**Jonathan Alles, Ivano Legnini, Maddalena Pacelli, and Nikolaus Rajewsky**

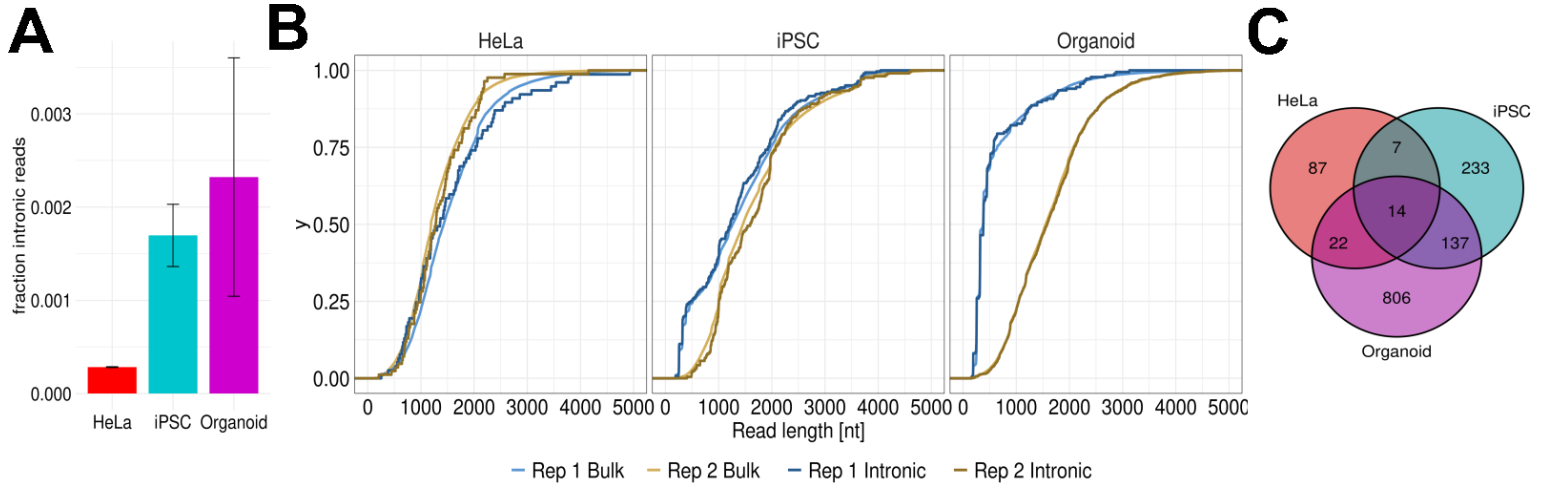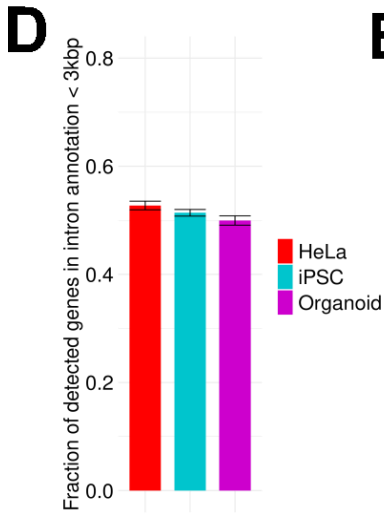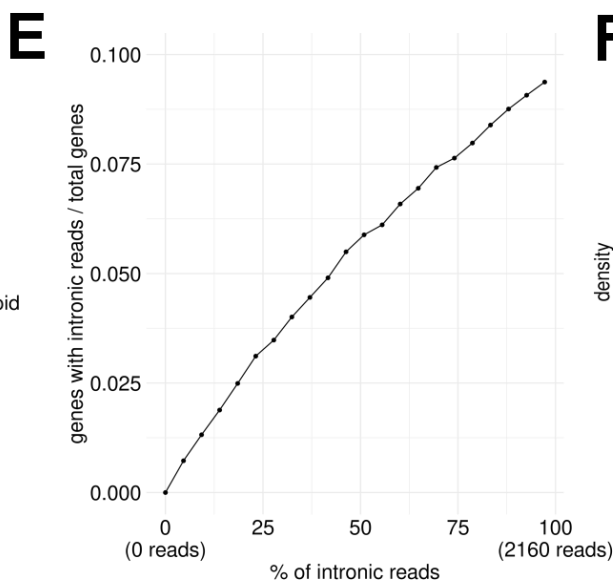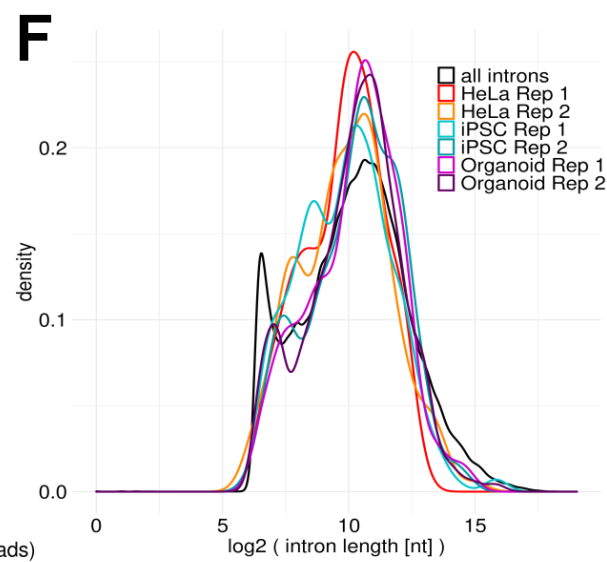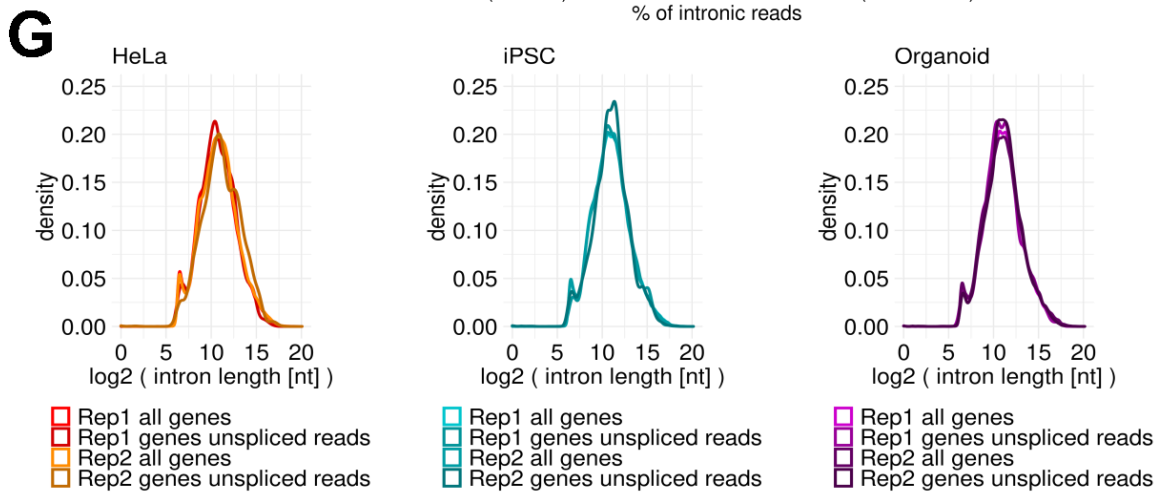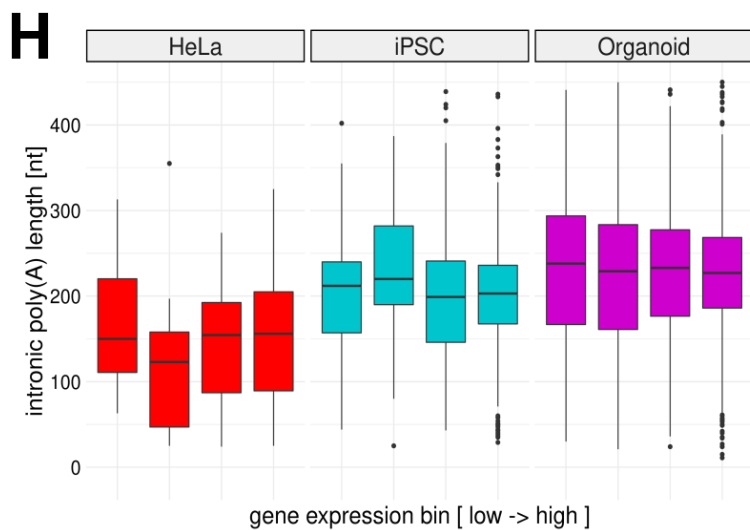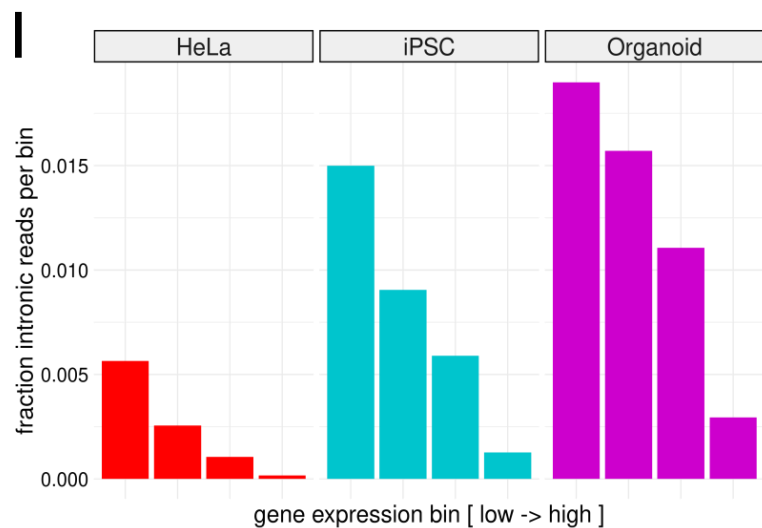

## **Figure S1. Features of unspliced mRNAs from PacBio datasets, Related to Figure 1**

**A** Fraction of unspliced, intronic reads in HeLa S3, iPSC, Organoids FLAM-seq datasets. Error bars indicate standard error of the mean for 2 replicates.

**B** Cumulative distributions of raw read length for intronic and bulk reads for HeLa S3, iPSC and Organoid datasets.

**C** Venn diagram of genes with detected unspliced (intronic) reads per dataset.

**D** Fraction of detected genes in FLAM-seq HeLa S3, iPSC, and Organoids dataset represented in the intron annotation database at a maximum intron distance of 3kb from gene end. Error bars indicate standard error of the mean for 2 replicates.

**E** Downsampling analysis: Intronic reads were downsampled to respective fraction of total reads and the fraction of genes with intronic reads was compared to the total of detected genes.

**F** Intron length of unspliced introns compared to distribution of all annotated introns for identification of unspliced molecules.

**G** Intron length distribution from Gencode annotation comparing all genes detected in a dataset with those genes with associated unspliced reads.

**H** Binning of intronic reads poly(A) length distributions by gene expression for merged datasets. Number of reads per bin is indicated below the boxplot.

**I** Fraction of intronic reads by gene expression bin for merged datasets.

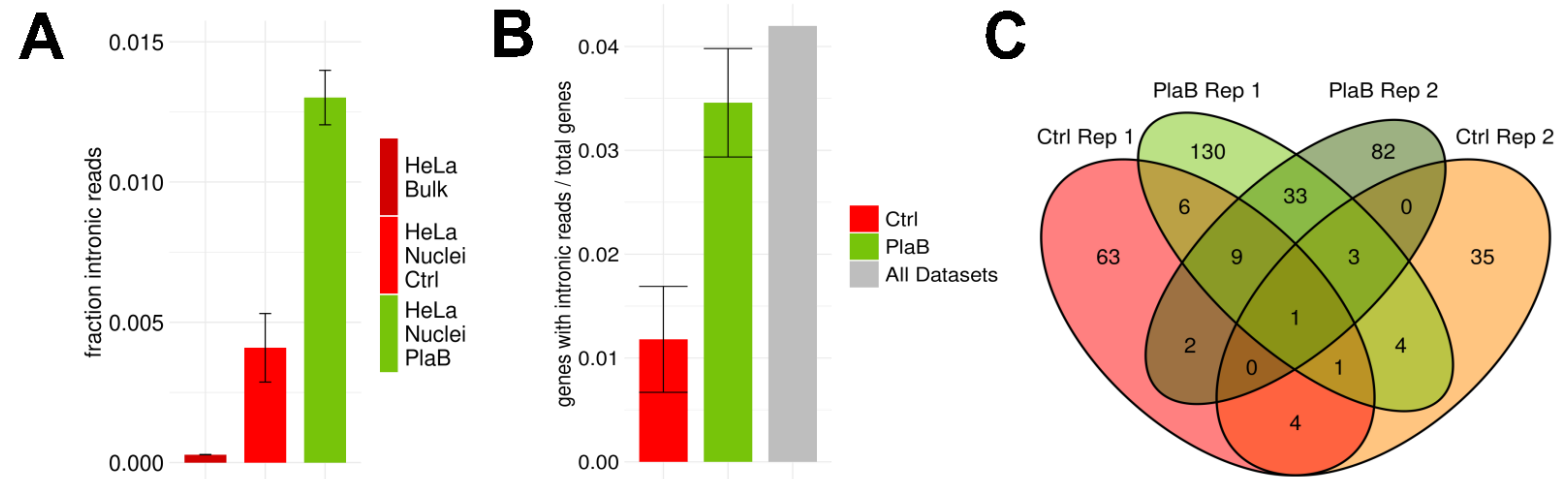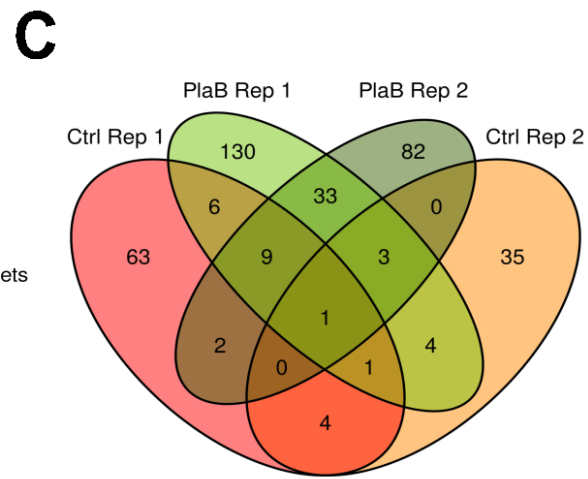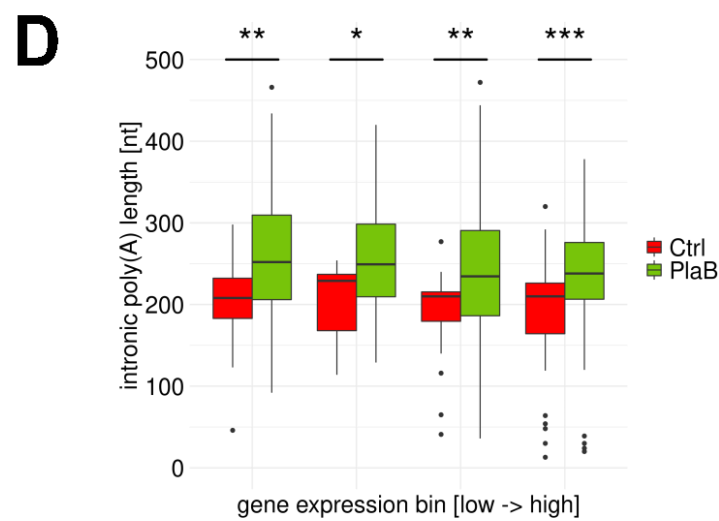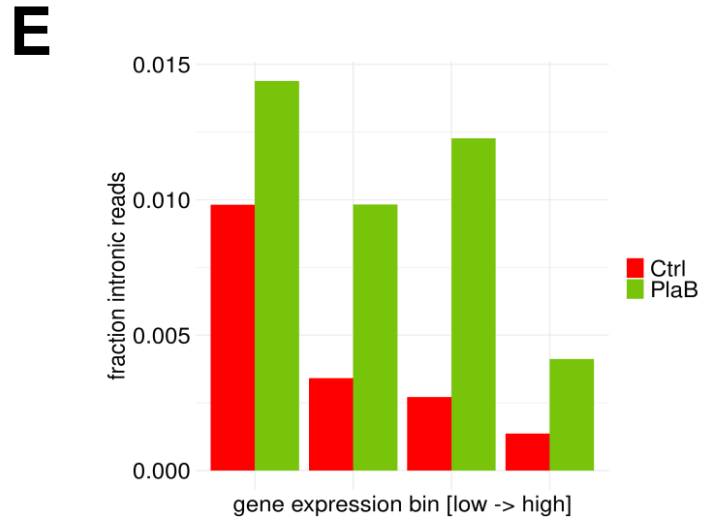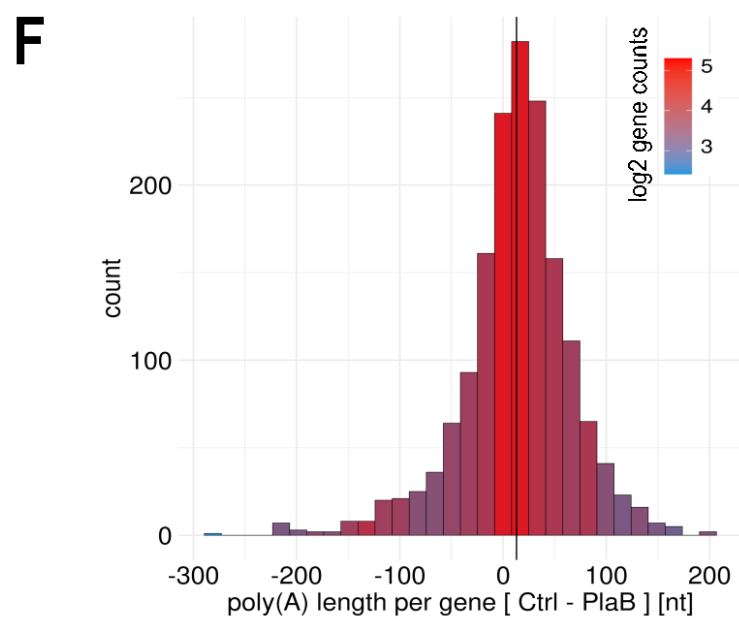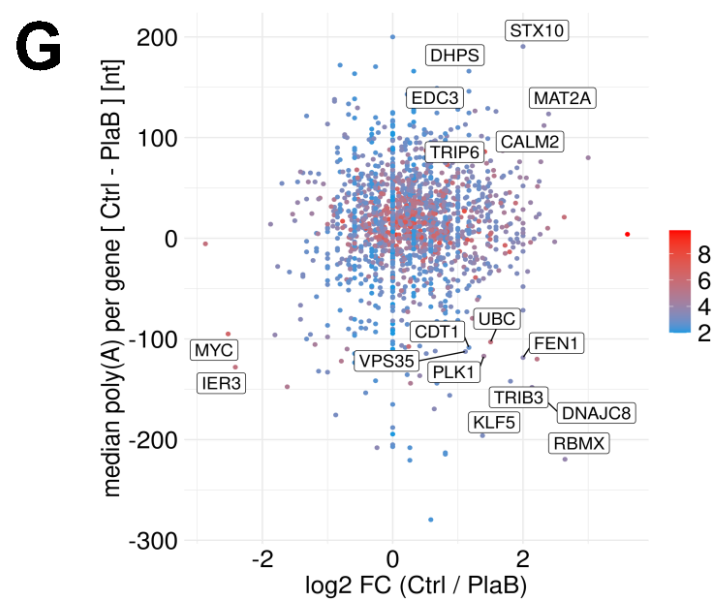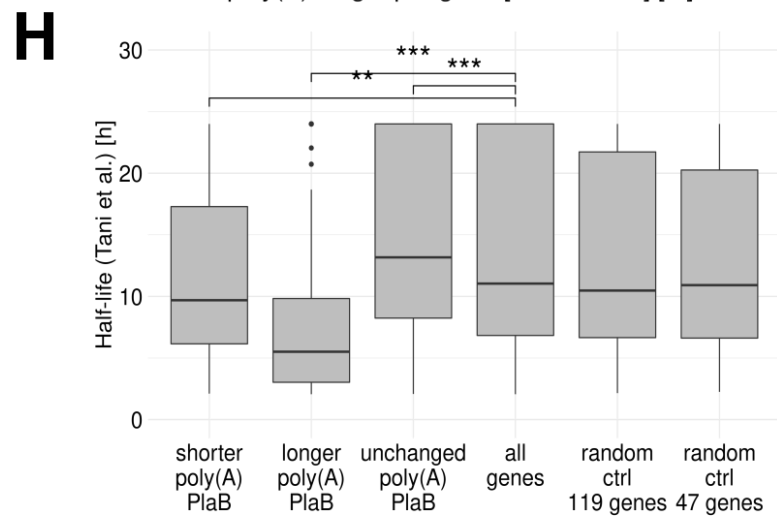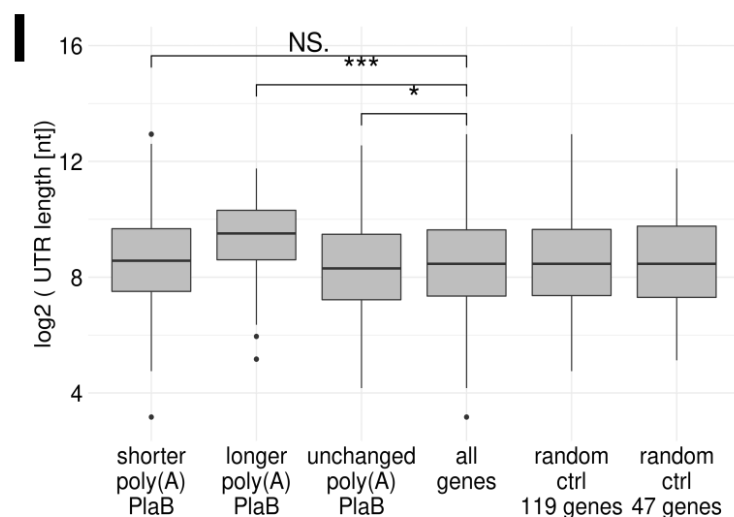

## Figure S2. Analysis of long reads upon splicing inhibition, Related to Figure 1

**A** Fraction of intronic reads for HeLa Bulk, Nuclei Ctrl and Nuclei PlaB conditions. Error bars denote standard deviation of 2 replicates.

**B** Fraction of genes with detected unspliced, intronic reads normalized to total number of genes detected in each dataset. Error bars denote standard deviation of 2 replicates.

**C** Venn diagram of genes with detected unspliced (intronic) reads per dataset.

**D** Binning of intronic reads poly(A) length distributions by gene expression for merged datasets. Number of reads per bin is indicated below the boxplot. Asterisks indicate significance level in difference between Ctrl and PlaB (two-sided t-Test; ns :  $P > 0.05$ , \* :  $P \leq 0.05$ , \*\* :  $P \leq 0.01$ , \*\*\* :  $P \leq 0.001$ ).

**E** Fraction of intronic reads by gene expression bin for merged datasets.

**F** Median poly(A) length difference per gene comparing HeLa S3 nuclei control versus PlaB treatment. Color indicates average  $\log_2$  gene counts. Vertical line indicates mean.

**G** Difference in median poly(A) length per gene between PlaB and control conditions compared to fold change in gene expression. Highlighted are genes with most prominent differences.

**H** Distributions of gene HeLa S3 half-life (Tani et al.) for bins of genes with change in poly(A) length upon PlaB splicing inhibition and control distributions. Asterisks indicate significance level in difference between Ctrl and PlaB (two-sided t-Test; ns :  $P > 0.05$ , \* :  $P \leq 0.05$ , \*\* :  $P \leq 0.01$ , \*\*\* :  $P \leq 0.001$ ).

**I** Distributions of transcript 3'UTR length for bins of genes with respective change in poly(A) length upon PlaB splicing inhibition and control distributions. Asterisks indicate significance level in difference between Ctrl and PlaB (two-sided t-Test; ns :  $P > 0.05$ , \* :  $P \leq 0.05$ , \*\* :  $P \leq 0.01$ , \*\*\* :  $P \leq 0.001$ ).

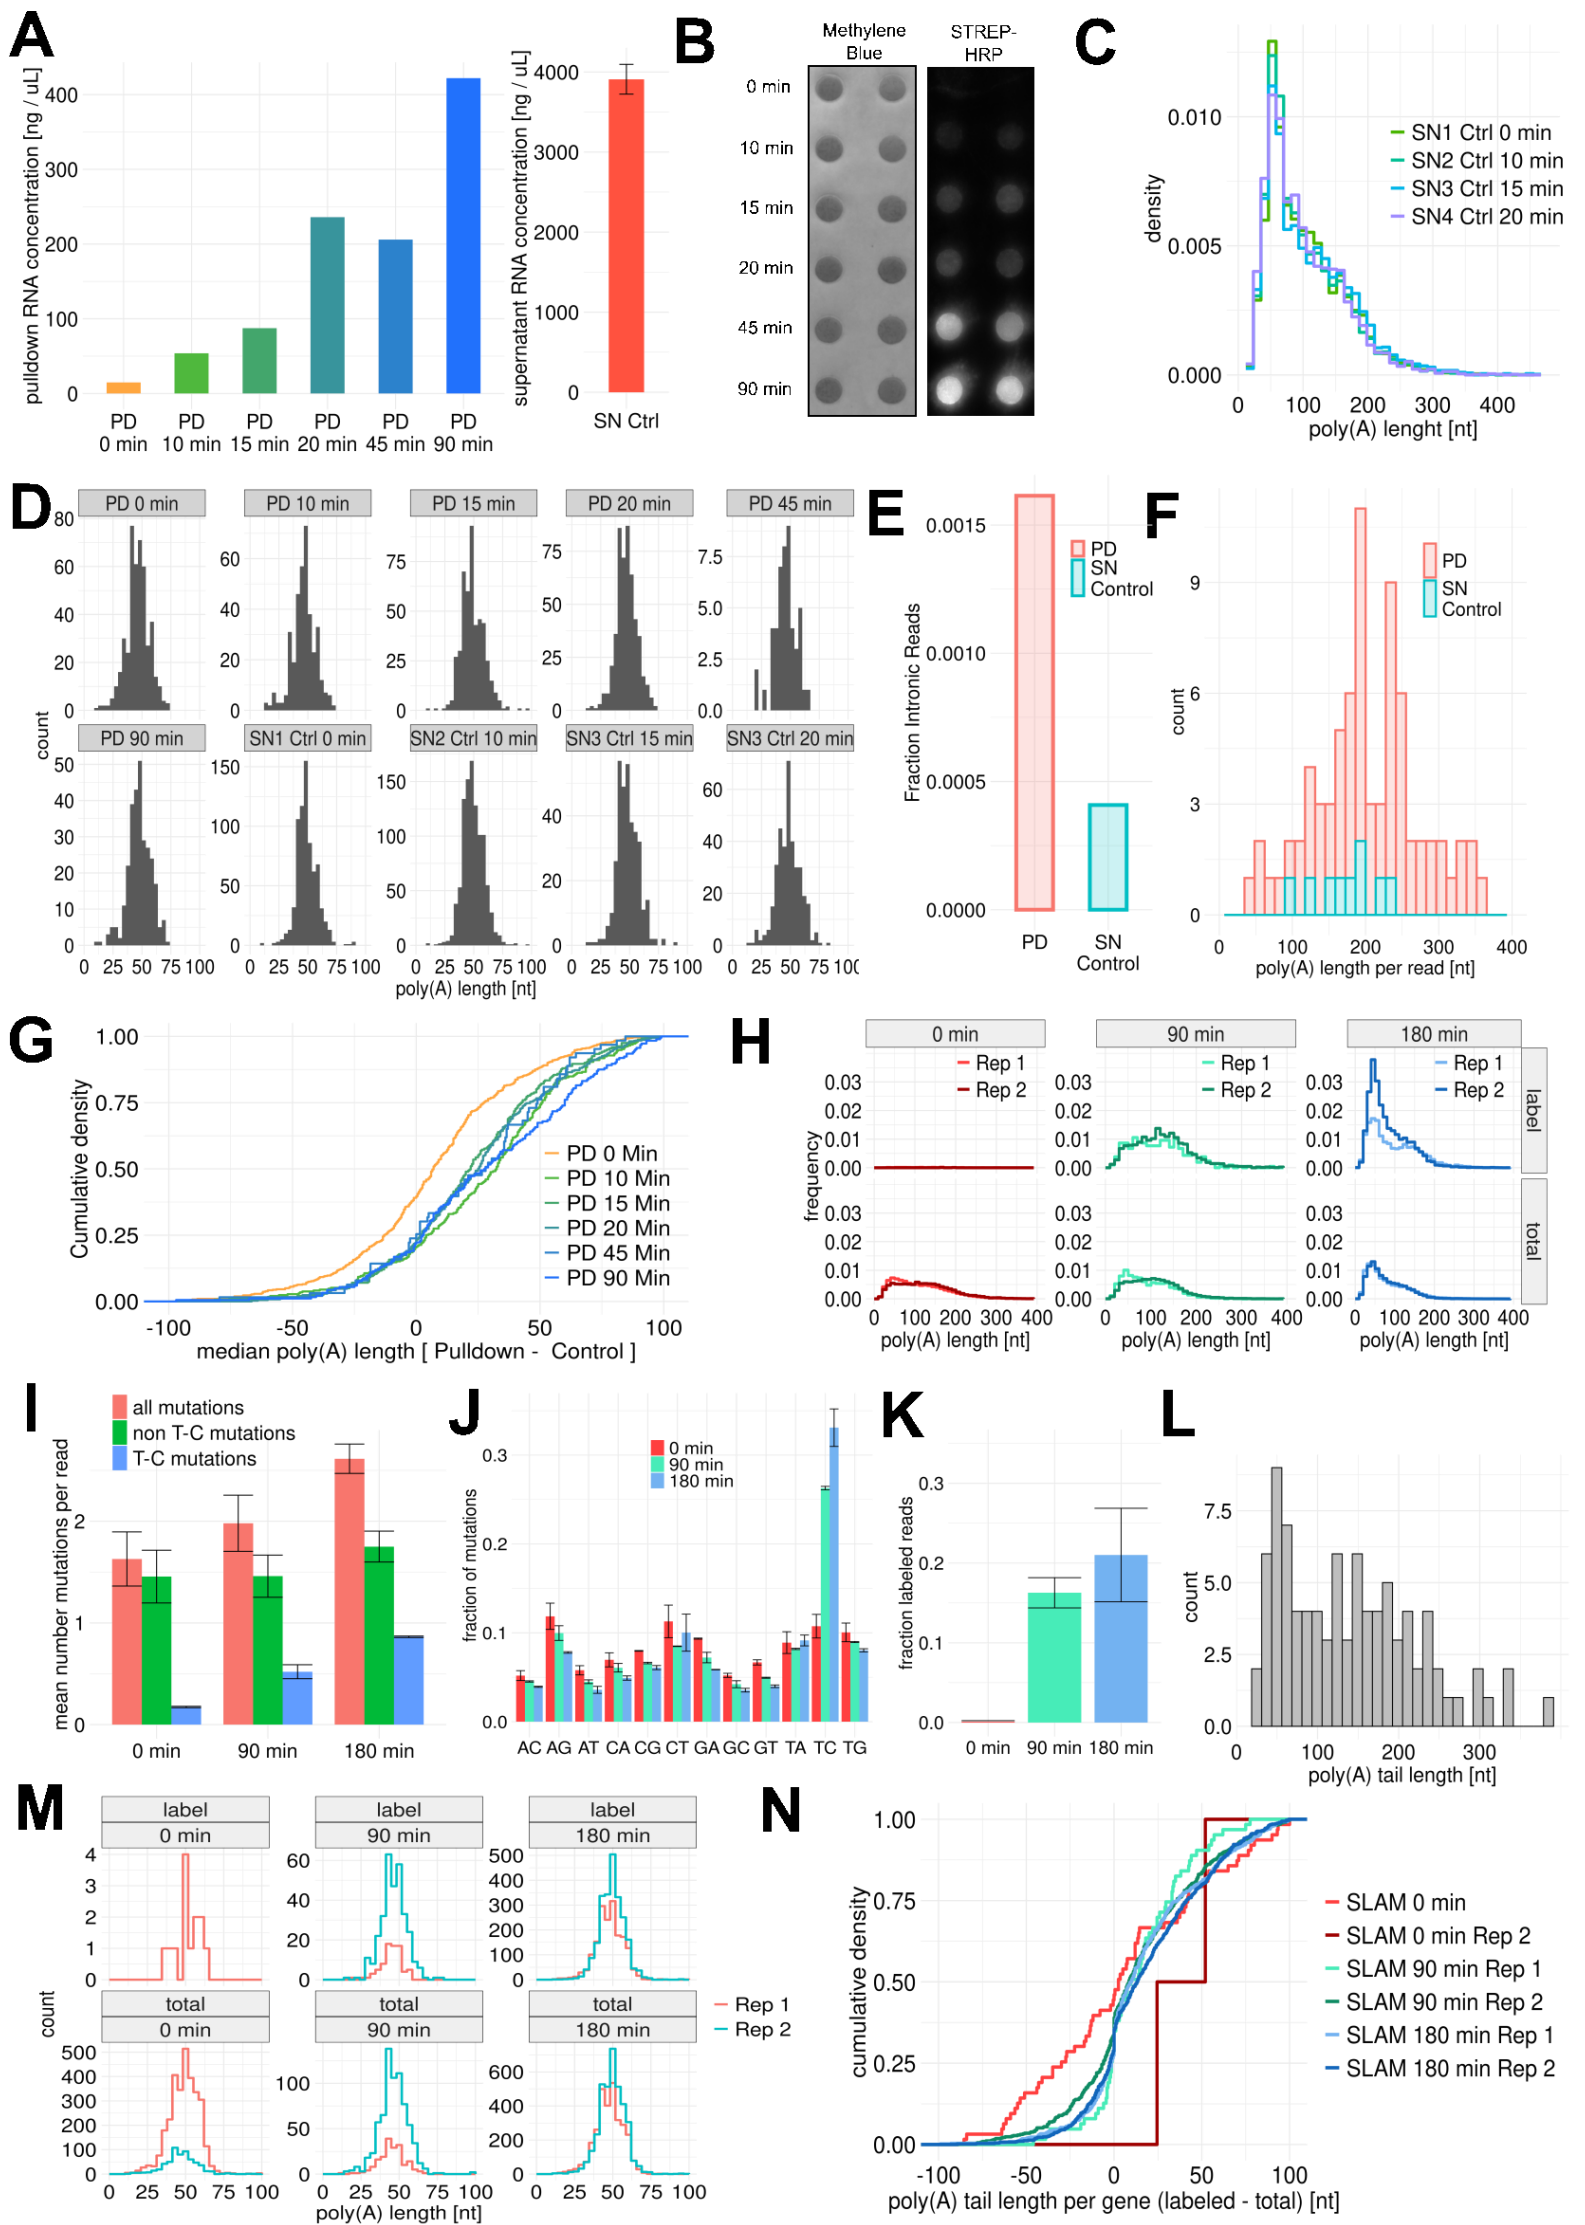

**Figure S3. Analysis of metabolic labeling experiments, Related to Figure 2**

**A** RNA concentrations obtained from pulldown (PD) fractions after indicated time points. Error bars denotes standard error of the mean.

**B** Dot blot with Methylene-Blue staining and Strep-HRP signal against biotinylated RNA before pulldown.

**C** Poly(A) length distribution of supernatant (SN) fractions for 0 min to 20 min labeling timepoints.

**D** Poly(A) length distributions of mitochondrial transcripts in PD and SN fractions.

**E** Fraction of intronic reads in merged datasets of PD and SN fractions.

**F** Poly(A) tail length distributions of intronic reads from merged datasets of PD and SN fractions.

**G** Cumulative density distribution of median poly(A) tail length difference per gene between PD and SN fractions.

**H** Poly(A) tail length profiles of labeled reads and all reads in SLAM-Seq experiments for 0 min, 90 min, and 180 min labeling.

**I** Average number of mutations per read in SLAM-Seq datasets considering all mismatches per read, T-to-C mismatches or non-T-C mismatches. Error bars denote standard deviation of 2 replicates.

**J** Observed nucleotide conversions in SLAM-Seq datasets normalized to all possible conversions. Error bars denote standard deviation of 2 replicates.

**K** Fraction of reads assigned as 'labeled' in SLAM-Seq datasets. Error bars denote standard deviation of 2 replicates.

**L** Poly(A) tail length distribution of intronic reads in merged SLAM-Seq datasets.

**M** Poly(A) tail length distributions of mitochondrial transcripts in labeled or total poly(A) tail length bin.

**N** Cumulative density distribution of median poly(A) tail length difference per gene between SLAM-Seq total and labeled reads.

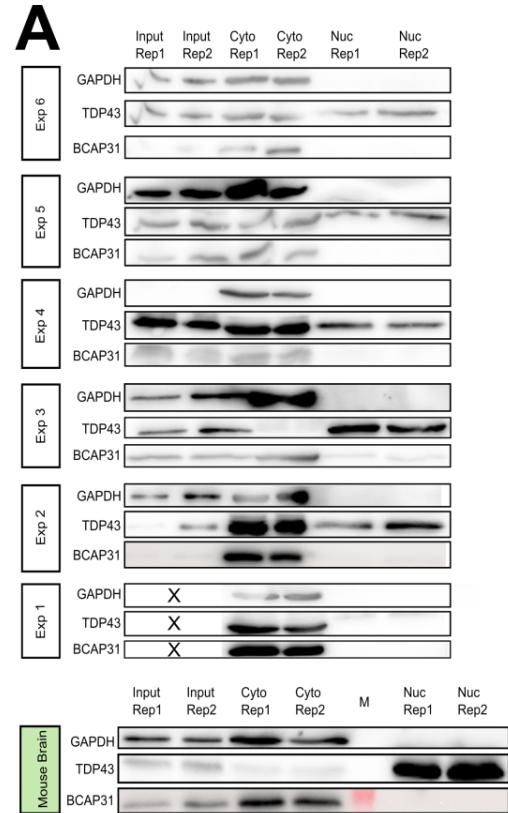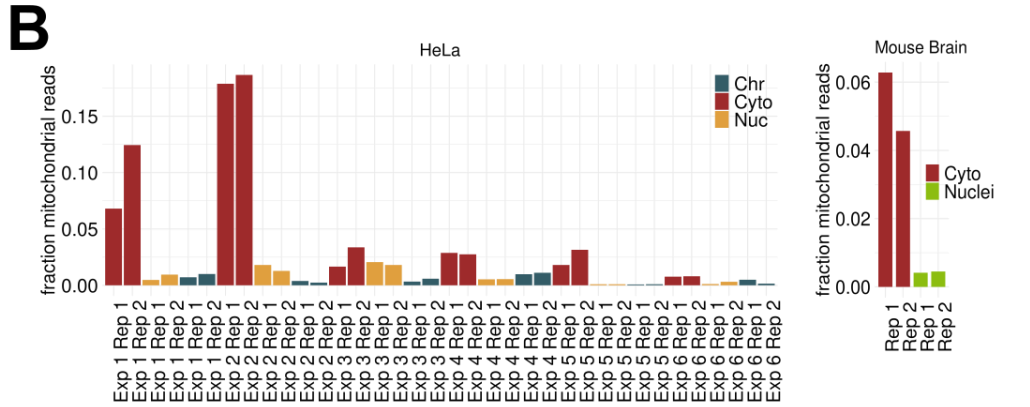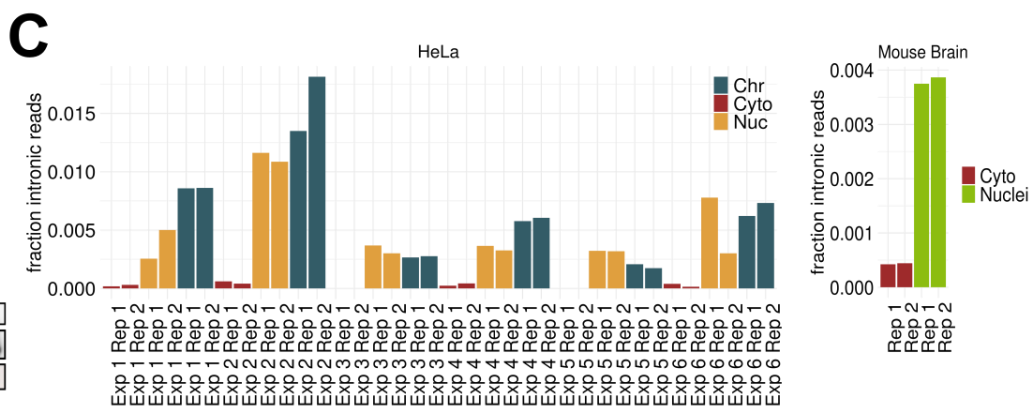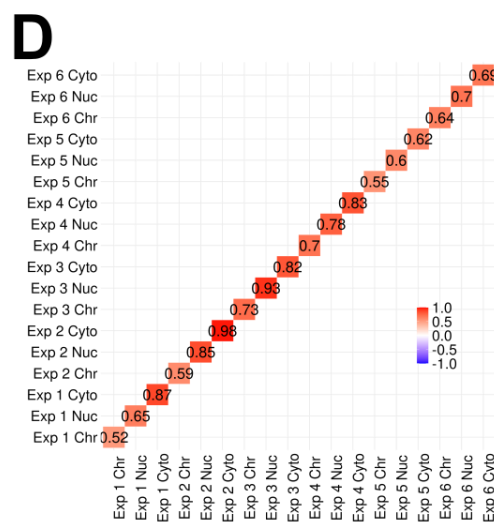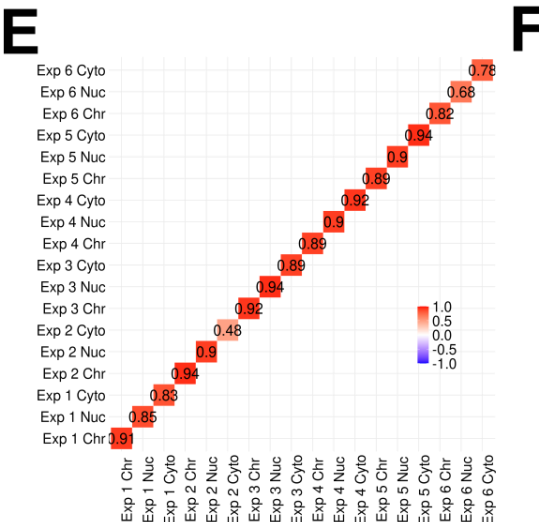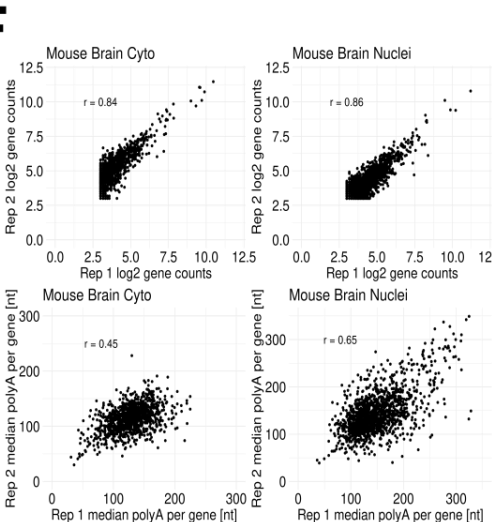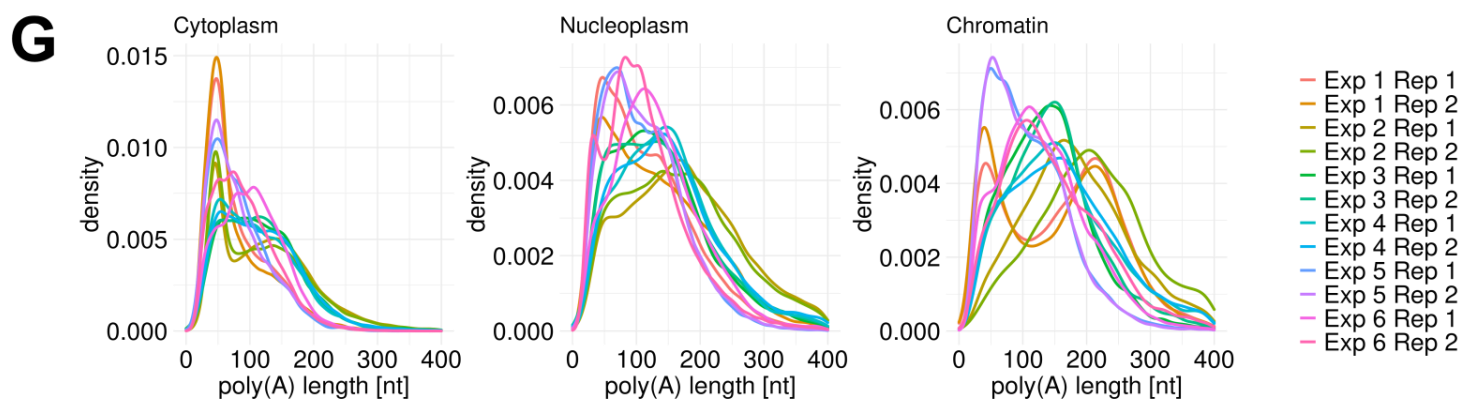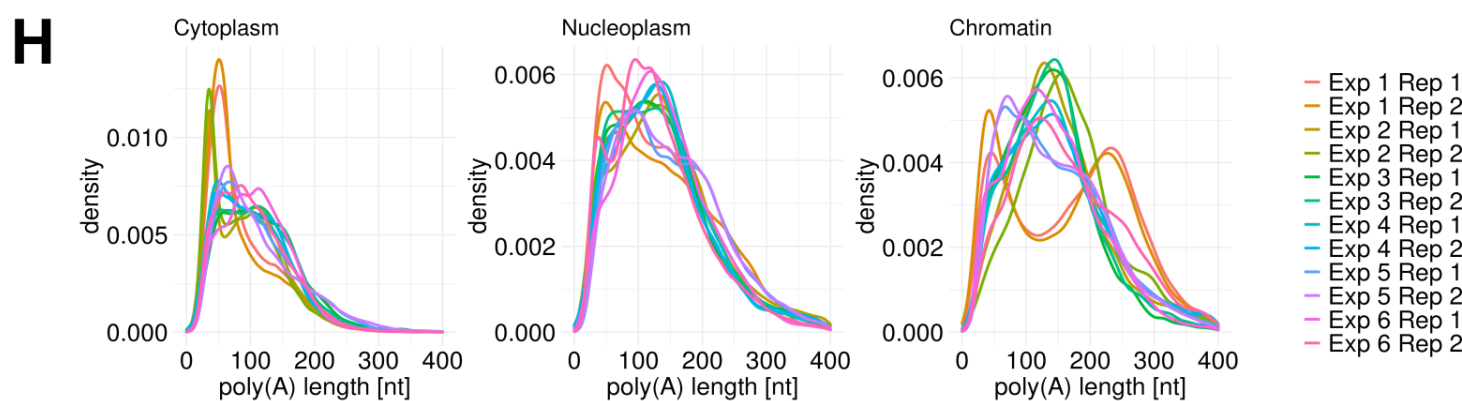



### **Figure S4. Validation of biochemical fractionations, Related to Figure 3**

**A** Western Blot analysis of fractions obtained from biochemical fractionation of HeLa S3 cell lines and mouse brain samples. Markers used are GAPDH as cytoplasmic marker, TDP43 as cytoplasmic and nuclear marker and BCAP31 as ER marker.

**B** Fraction of mitochondrial reads in each replicate for cytoplasmic, nucleoplasmic and chromatin fractions. Left: HeLa S3 cell lines Right: Mouse brain.

**C** Fraction of intronic reads in each replicate for cytoplasmic, nucleoplasmic and chromatin fractions. Left: HeLa S3 cell lines Right: Mouse brain.

**D** Correlation coefficients for median poly(A) tail length per gene between HeLa S3 technical replicates and corresponding fractions for genes with more than 10 counts.

**E** Correlation coefficients for gene expression counts between HeLa S3 technical replicates and corresponding fractions for genes with more than 10 counts.

**F** Comparison of gene expression counts per gene (top) and median poly(A) tail length per gene (bottom) for HeLa S3 mouse brain samples for genes with more than 8 counts.

**G** Poly(A) tail length densities for HeLa S3 samples by fraction.

**H** Poly(A) tail length densities for HeLa S3 samples by fraction scaled by average poly(A) tail length of sample over all fractions.

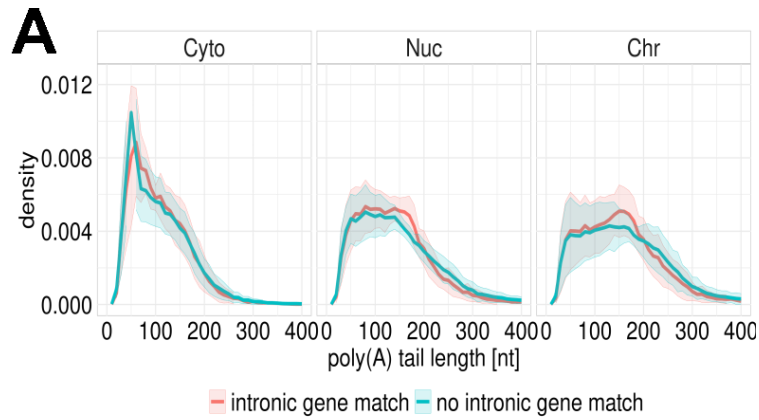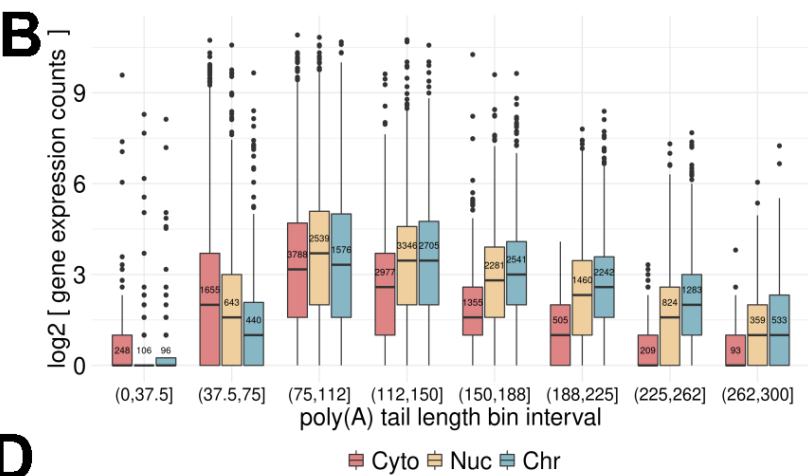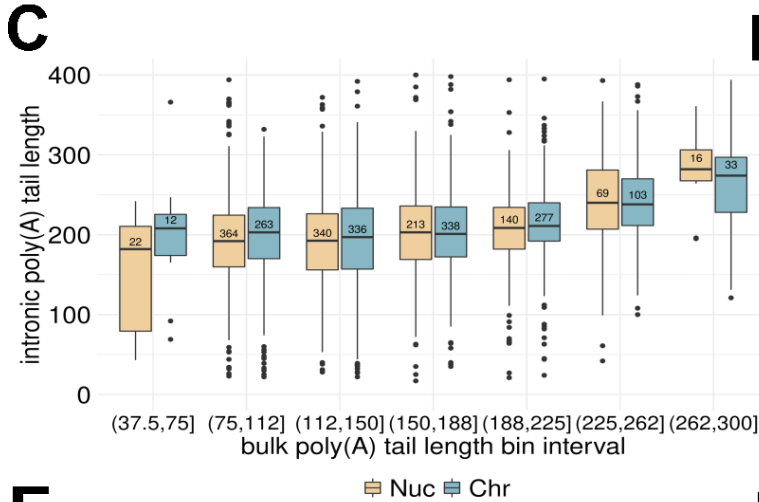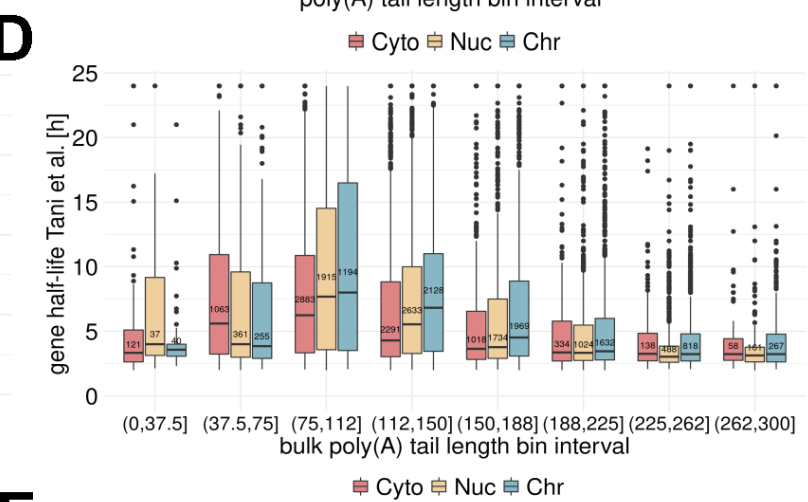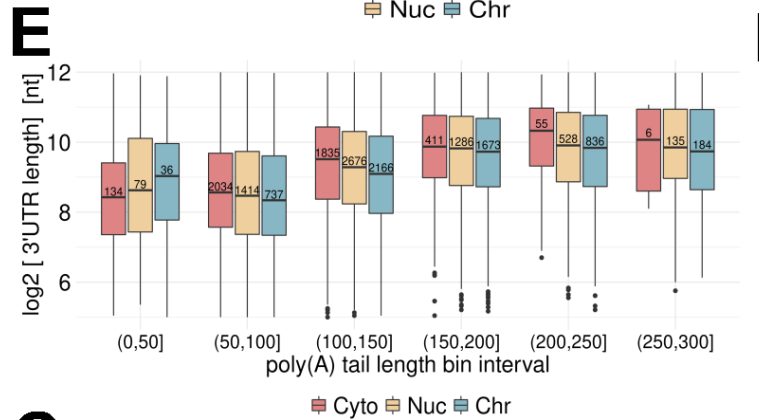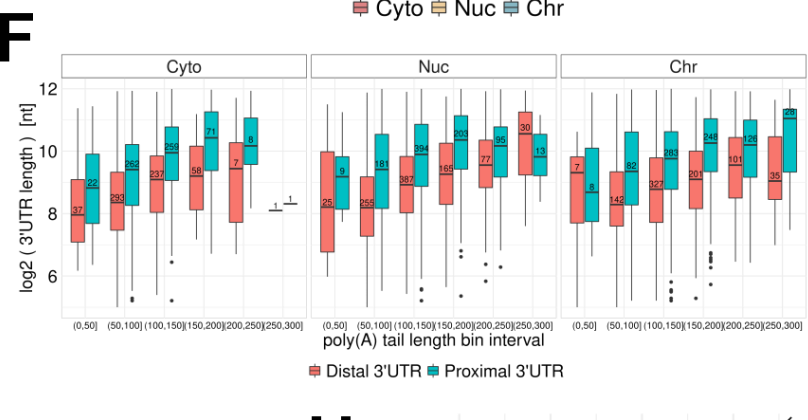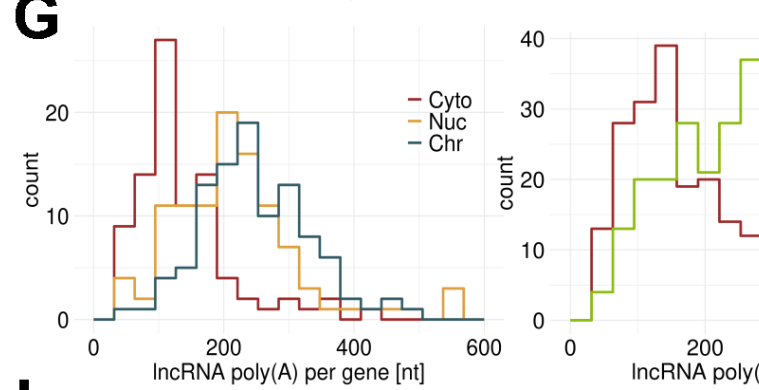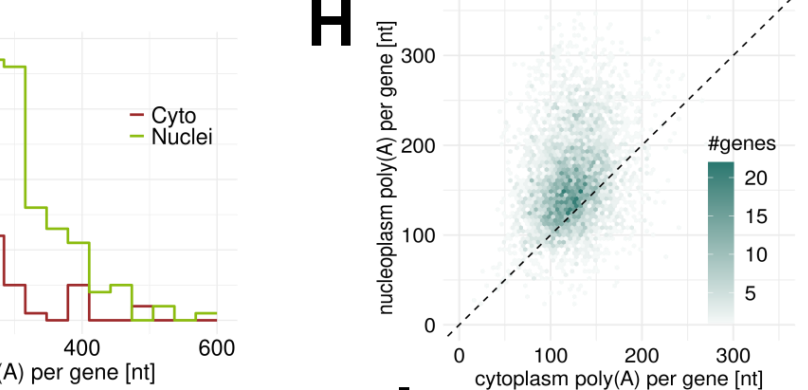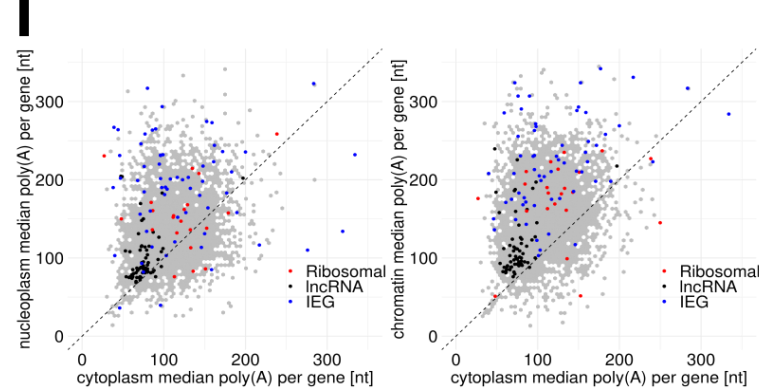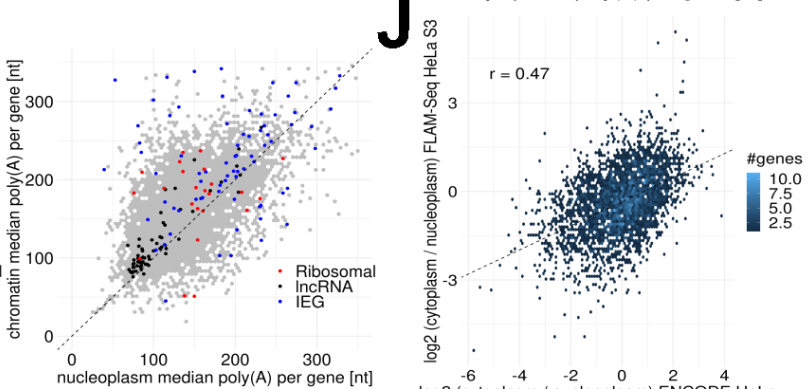

### **Figure. S5 Poly(A) tail analysis for biochemical fractionations, Related to Figure 3**

**A** Bulk poly(A) tail length distribution of genes with detected intronic reads ('intronic gene match') versus genes without detected intronic reads for HeLa S3 cell fractions. Ribbons indicate standard deviation of 12 replicate samples.

**B** Molecule counts for genes binned by average poly(A) tail length per gene. Numbers indicate the number of genes in each bin. Datasets were merged by biochemical fraction.

**C** Poly(A) tail length of intronic reads binned by median poly(A) tail length of associated genes. Numbers indicate the number of intronic reads in each bin. Datasets were merged by biochemical fraction.

**D** Half-lives for genes binned by median poly(A) tail length. Numbers indicate the number of genes in each bin. Datasets were merged by biochemical fraction.

**E** 3'UTR length for genes binned by median poly(A) tail length. Numbers indicate the number of genes in each bin. Datasets were merged by biochemical fraction.

**F** 3'UTR length of proximal and distal 3'UTR isoforms for genes with 2 annotated 3'UTR isoforms binned by median poly(A) tail length for each isoform. Numbers indicate the number of 3'UTR isoforms in each bin. Datasets were merged by biochemical fraction.

**G** Median poly(A) tail length per gene for lncRNA genes in HeLa S3 fractionation experiments (left) and mouse brain fractionations (right). Datasets were merged by biochemical fraction.

**H** Median poly(A) tail length per gene between cytoplasmic and nuclear fractions for mouse brain fractionation experiments. Datasets were merged by biochemical fraction.

**I** Median poly(A) tail length per gene compared across fractions from HeLa S3 cell lines for ribosomal protein genes ('Ribosomal'), immediate early genes ('IEGs') and lncRNAs. Datasets were merged by biochemical fraction.

**J** Cytoplasmic-to-nuclear enrichment of genes quantified by ENCODE for HeLa cell lines versus FLAM-seq quantification. Datasets were merged by biochemical fraction.

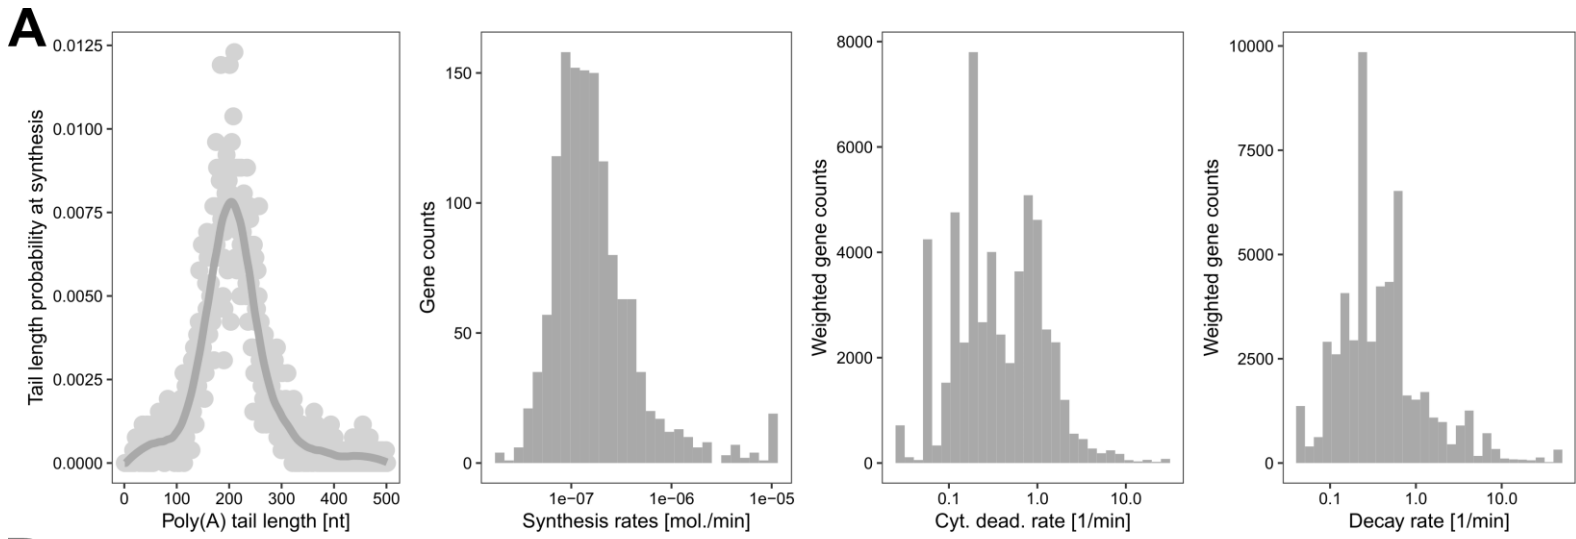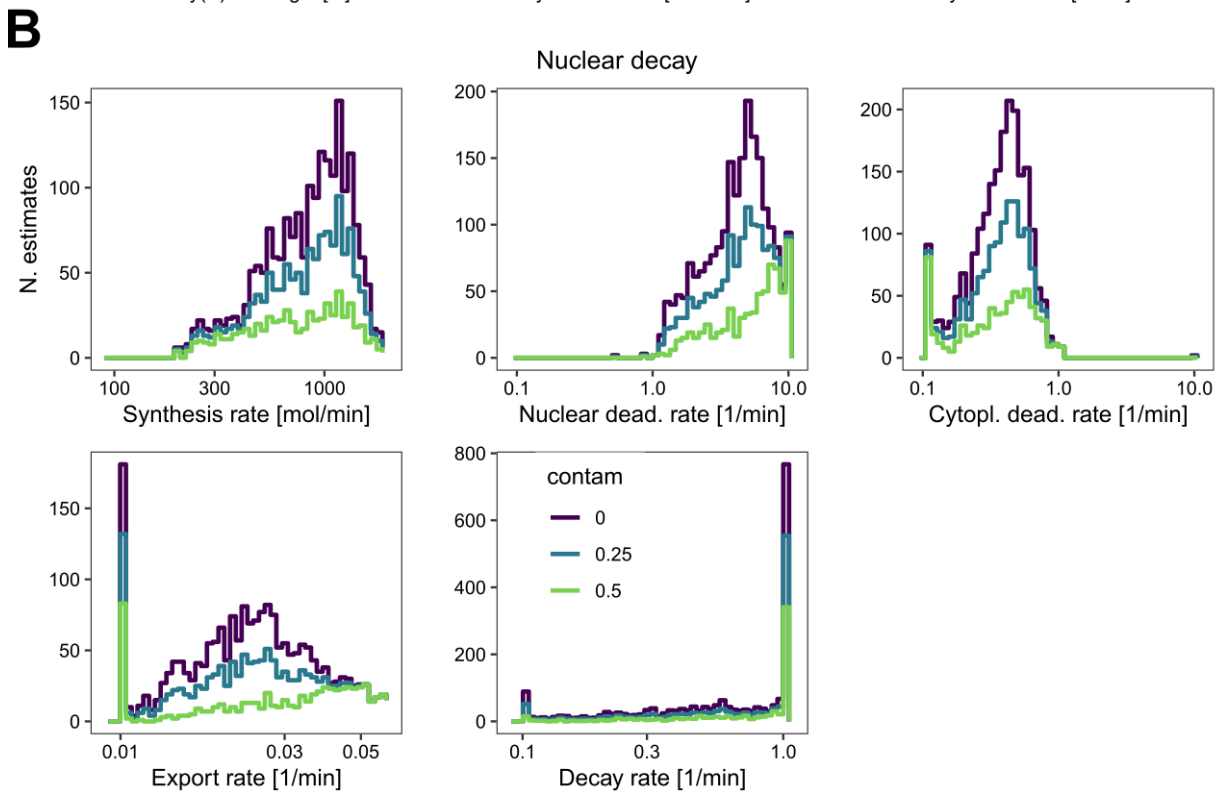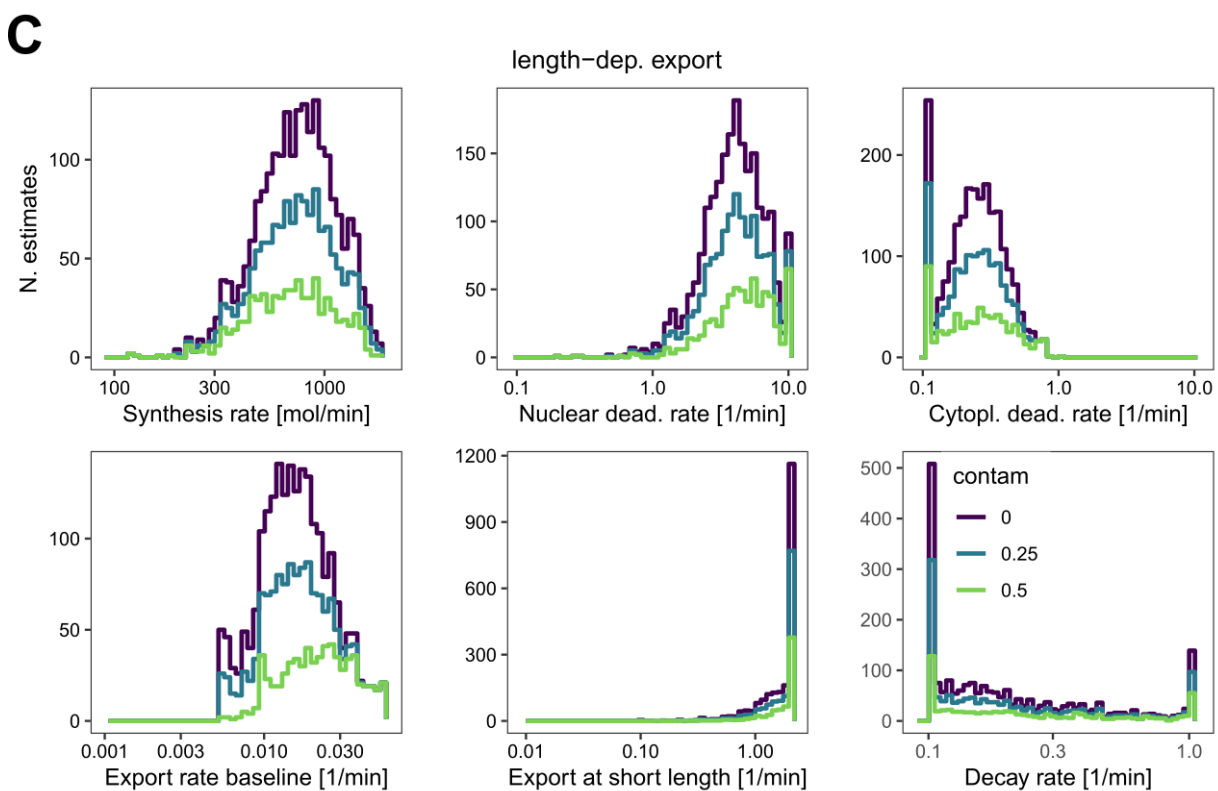

### **Figure S6. Rate estimates for deadenylation models, Related to Figure 4**

**A** Data used for initial parameter guesses in the optimization: slp parameter (left) is estimated from intronic reads of 12 FLAM-seq fractionation replicates; synthesis rates are estimated by summing up all transcription rates estimated from Eisen et al. (2020) (distribution per gene shown in middle left), nuclear and cytoplasmic deadenylation rates are initialized according to the mean of the deadenylation rates measured by Eisen et al. (2020) (distribution weighted for gene expression in FLAM-seq data shown in middle right); decay rate: same as before (right).

**B** From top left to bottom right: final distributions from optimization of synthesis rate, nuclear and cytoplasmic deadenylation rate, export rate, decay rate. Parameters were estimated with cytoplasmic contamination of nuclear RNA set at 0, 25 and 50% (see color legend), for the nuclear decay - constant export (ndce) model.

**C** Same as B., for the no nuclear decay, tail length dependent export (nndle) model.

**A**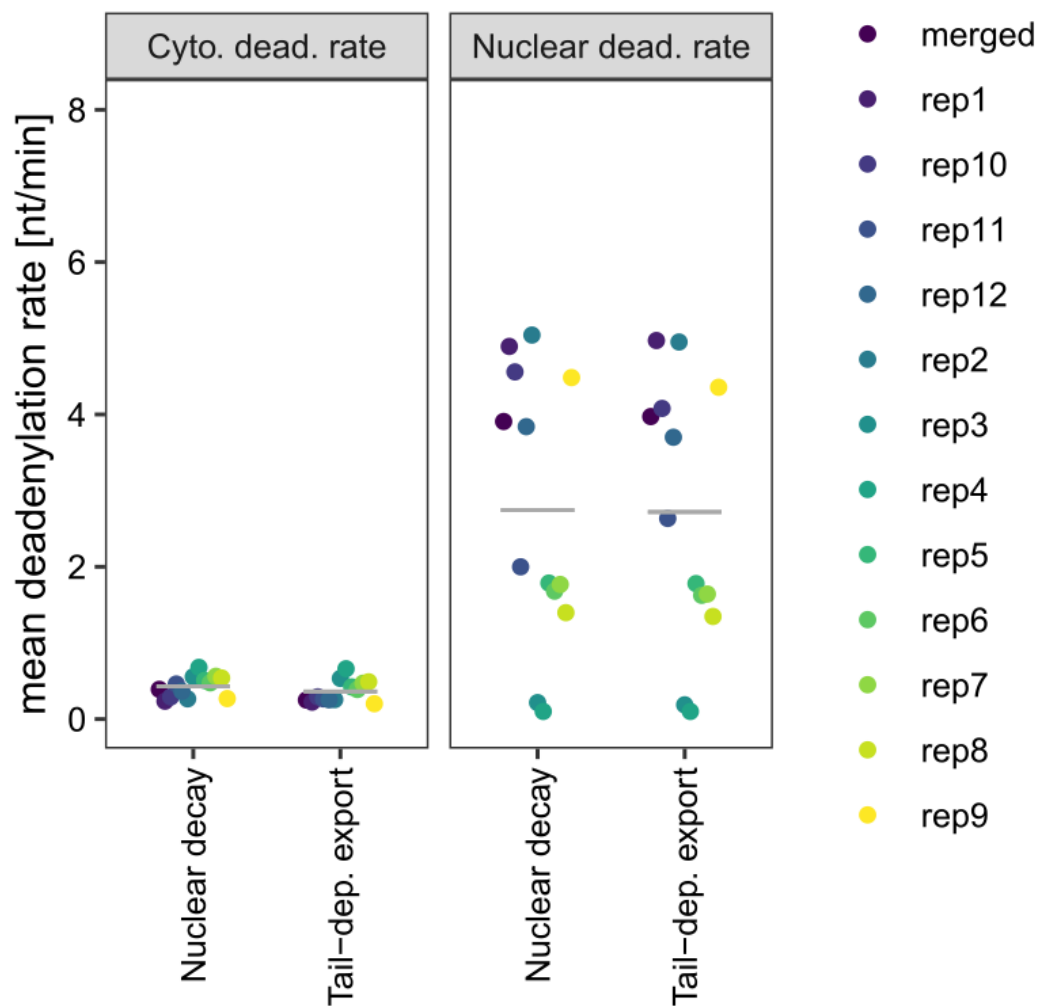**B**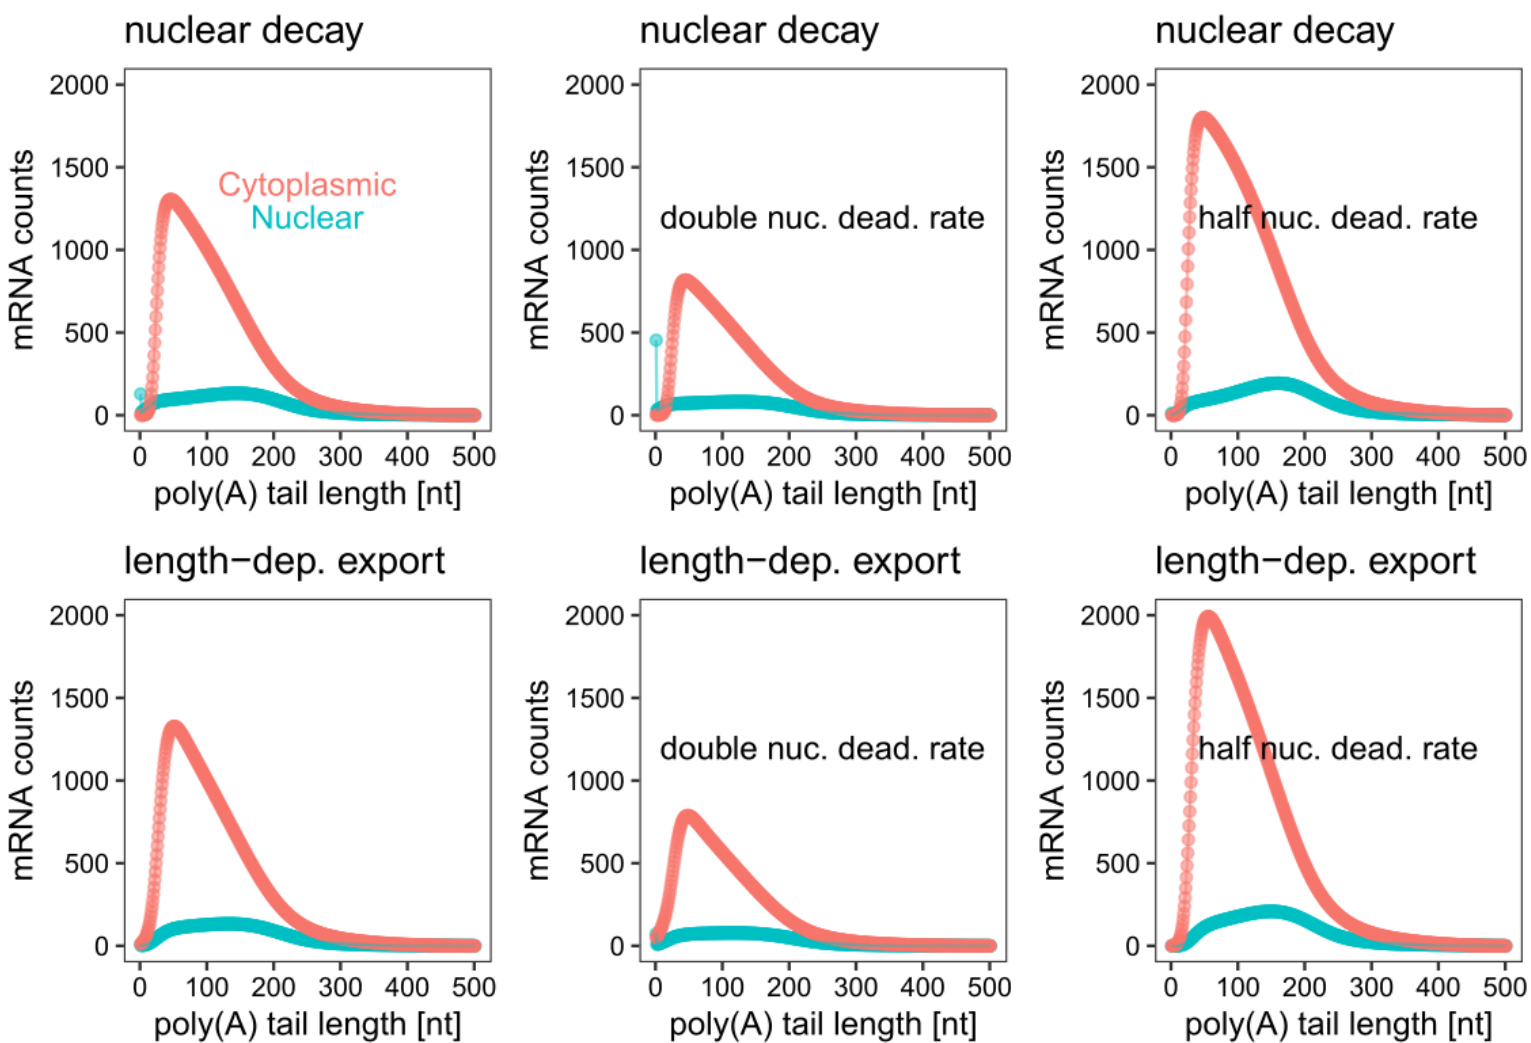

**Figure. S7 Deadenylation rates and poly(A) profiles for deadenylation models, Related to Figure 4**

**A** Values of  $k_1$  and  $k_2$  (nuclear and cytoplasmic deadenylation rate) estimated independently from 12 fractionation experiments for both nuclear decay constant export (ndce) and no nuclear decay, tail length dependent export (nndle).  $k_1$  values are consistently higher than  $k_2$ , except for two replicates, which were performed in the same batch, and where tail lengths were overall longer than for all other replicates (possibly a technical artifact of the poly(A) selection step in the FLAM-seq protocol as discussed in the results section).

**B** Simulation of mRNA levels in the nucleus (green) and cytosol (red) with the model assuming constant export and nuclear decay (ndce model; top) and the model assuming tail-length dependent export (nndle model; bottom), using the average of the estimated parameters distributions as input (left), or increasing and decreasing the nuclear deadenylation  $k_1$  rate 2-fold (middle and right). For this specific example, we assumed a cytoplasmic contamination in the nuclear fraction of 0%.

| Process                    | Parameter   | Definition                                           | Initial values                            | Final values (ndce/nndle)                                | Description                                                                                                                                                                                    |
|----------------------------|-------------|------------------------------------------------------|-------------------------------------------|----------------------------------------------------------|------------------------------------------------------------------------------------------------------------------------------------------------------------------------------------------------|
| Data input                 | a           | mRNA molecules per cell                              | fixed at 200000                           | fixed                                                    | total number of mRNA molecules per cell (at steady state)                                                                                                                                      |
| Data input                 | b           | nuc/cyt ratio                                        | 0.21                                      | fixed                                                    | Ratio of mRNA molecules in the nucleus vs in the cytoplasm, estimated from RNA abundance in 12 fractionation experiments                                                                       |
| Data input                 | c           | chr/nuc ratio                                        | 0.69                                      | fixed                                                    | Ratio of mRNA molecules in the chromatin vs in the nucleoplasm estimated from RNA abundance in 12 fractionation experiments; used to weight FLAM-seq data from cell fractionations             |
| Data input                 | contam      | cytoplasmic contamination                            | 0.00, 0.25, 0.50                          | fixed (at three different values)                        | Assumed contamination of cytoplasmic mRNA in the nuclear fraction; three different scenarios tested                                                                                            |
| Data input                 | l (lengths) | tail lengths [nt]                                    | from 1 to 501                             | fixed                                                    | allowed tail lengths (from 1 to 501)                                                                                                                                                           |
| Data input                 | nuc_data    | nuclear tail length distribution                     | empirical distribution from FLAM-seq data | fixed (scaled with contam and for individual replicates) | Distribution of tail lengths for nuclear mRNA as observed in FLAM-seq data from nucleoplasm and chromatin fractions; function of a, b, c, contam                                               |
| Data input                 | cyt_data    | cytoplasmic tail length distribution                 | empirical distribution from FLAM-seq data | fixed (scaled with contam and for individual replicates) | Distribution of tail lengths for cytoplasmic mRNA as observed in FLAM-seq data from cytoplasmic fraction; function of a, b, c, contam                                                          |
| Data input / transcription | slp         | tail length probability at synthesis                 | empirical distribution from FLAM-seq data | fixed                                                    | probability function for tail length at synthesis, fixed from FLAM-seq data (intronic reads)                                                                                                   |
| Transcription              | $\alpha$    | synthesis rate [molecules/min]                       | 719                                       | 914 +/- 372, 782 +/- 314                                 | multiplier for slp, represent the total number of mRNA molecules produced per minute in a cell; recomputed from Eisen et al., 2020.                                                            |
| Nuclear deadenylation      | $k_1$       | nuclear deadenylation rate [ $\text{min}^{-1}$ ]     | 0.25                                      | 4.23 +/- 2.05, 4.06 +/- 2.04                             | constant deadenylation rate in the nucleus; initial values provided as the weighted mean from Eisen et al., 2020                                                                               |
| Export (ndce)              | $k_E$       | export rate [ $\text{min}^{-1}$ ]                    | 0.02                                      | 0.024 +/- 0.009                                          | constant export rate (does not vary with tail length); if export constant, decay is allowed also in the nucleus                                                                                |
| Export (nndle)             | $s_E$       | export rate [ $\text{min}^{-1}$ ]                    | 0.02                                      | 0.016 +/- 0.01                                           | constant baseline for logistic export rate (does not vary with tail length; added to a logistic function defined by $a_E, m_E, v_E$ ); if export is logistic, decay not allowed in the nucleus |
| Export (nndle)             | $a_E$       | export rate [ $\text{min}^{-1}$ ]                    | 1.2                                       | 1.60 +/- 0.50                                            | logistic export rate (varies with tail length)                                                                                                                                                 |
| Export (nndle)             | $m_E$       | tail length scaling                                  | 5                                         | 6 +/- 3                                                  | tail length mean for logistic export rate                                                                                                                                                      |
| Export (nndle)             | $v_E$       | tail length variance                                 | 10                                        | 12 +/- 4                                                 | tail length variance for logistic export rate                                                                                                                                                  |
| Cytoplasmic deadenylation  | $k_2$       | cytoplasmic deadenylation rate [ $\text{min}^{-1}$ ] | 0.25                                      | 0.39 +/- 0.32, 0.26 +/- 0.13                             | constant deadenylation rate in the cytoplasm; initial value provided as weighted mean from Eisen et al., 2020                                                                                  |
| Decay                      | $a_d$       | decay rate [ $\text{min}^{-1}$ ]                     | 0.31                                      | 0.63 +/- 0.33, 0.26 +/- 0.25                             | logistic decay rate: allowed only in cytoplasm, or also in the nucleus in case of constant export; initial value provided as weighted mean from Eisen et al., 2020                             |
| Decay                      | $m_d$       | tail length scaling                                  | 16                                        | 10 +/- 5, 11 +/- 6                                       | tail length mean for logistic decay rate; initial value provided from Eisen et al., 2020                                                                                                       |
| Decay                      | $v_d$       | tail length variance                                 | 11                                        | 6 +/- 2, 9 +/- 3                                         | tail length variance for logistic decay rate; initial value provided from Eisen et al., 2020                                                                                                   |



**Supplementary Table 1, Related to Figure 4.**

Definition and description for all parameters used in the ndce and nndle models optimization. Means of initial guesses are shown, while estimated values are shown as mean and standard deviation of merged distribution from 1,000 iterations for 0, 25 and 50% cytoplasmic contamination of nuclear fraction, for ndce and nndle (comma separated).
